# Supplementary material
Source: ML conference proceedings conference paper supplement (https://www.ecva.net/papers/eccv_2024/papers_ECCV/html/3632_ECCV_2024_paper.php)
Supplement: Supplementary file 1 [file 03632-supp.pdf]

# Omni6D: Large-Vocabulary 3D Object Dataset for Category-Level 6D Object Pose Estimation - Supplementary Materials -

Mengchen Zhang<sup>1,2</sup>, Tong Wu<sup>3</sup>, Tai Wang<sup>2</sup>, Tengfei Wang<sup>2</sup>, Ziwei Liu<sup>4</sup>, and  
Dahua Lin<sup>2,3</sup>

<sup>1</sup> Zhejiang University, Zhejiang, China

<sup>2</sup> Shanghai Artificial Intelligence Laboratory, Shanghai, China

<sup>3</sup> The Chinese University of Hong Kong, Hong Kong SAR

<sup>4</sup> Nanyang Technological University, Singapore

{zhangmengchen, wangtai, wangtengfei}@pjlab.org.cn,  
{wt020, dhlín}@ie.cuhk.edu.hk, ziwei.liu@ntu.edu.sg

## A Overviews

In the supplementary materials, we delve deeper into our research, offering a comprehensive exploration of several aspects mentioned in the main text. We unpack the details of the *Omni6D* dataset, exploring its structure and statistics. We provide the construction details of the latest datasets, *Omni6D-xl* and *Omni6D-Real*. We provide a meticulous examination of the experimental procedures and analysis integral to our study. Additionally, we provided detailed insights into the questionnaire setting and result details regarding the visual realism of our Omni6D dataset. These supplemental details are invaluable in facilitating a better understanding of our research methods and discoveries.

## B Dataset Details

### B.1 Omni6D overview

**Dataset structure.** Our dataset is stored in folder-based structure. As illustrated in Fig. S1, it comprises symmetry annotations, point clouds sampled from 3D scanned objects with adjusted canonical poses, and rendered views. We also provide a Blender-based simulation framework to facilitate users.

Specifically for depth images, we applied a mapping transformation as mentioned in the main text. Original depth maps, saved as EXR files, have float32 precision with an accuracy of approximately  $1e^{-7}$  and a size of 32 bits per pixel. Converting these depth maps to RGB format with a scaling factor of 10000 maintains a precision of about  $1e^{-4}$ , reducing storage size by 25% with 24 bits per pixel. Due to PNG compression, actual storage can be reduced to 5%-10% of the original size. Also, our depth map compression method enables direct visualization in PNG format.

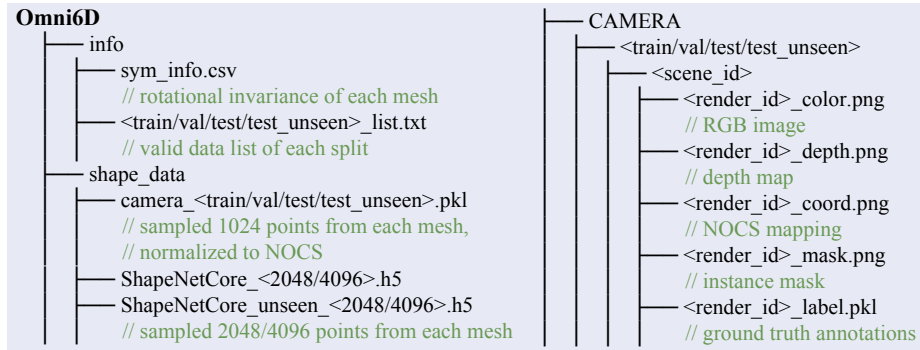

Fig. S1: Dataset structure.

**Table R1: Detailed statistical overview of Omni6D dataset.** The table provides information about the number of categories, instances, and images in Omni6D<sub>train</sub>, Omni6D<sub>val</sub>, Omni6D<sub>test</sub> and Omni6D<sub>out</sub>.

| Datasets | # Categories | # Instances | # Images |
|----------|--------------|-------------|----------|
| Train    | 166          | 3,294       | 812,602  |
| Val      | 166          | 919         | 28,661   |
| Test     | 166          | 475         | 14,267   |
| Out      | 17           | 52          | 4,762    |

**Omni6D splits.** Tab. R1 provides information about the number of categories, instances, and images in Omni6D<sub>train</sub>, Omni6D<sub>val</sub>, Omni6D<sub>test</sub> and Omni6D<sub>out</sub>. The categories are shared amongst the training, validation, and testing datasets, with a distribution ratio of 7:2:1 for instances. On the other hand, Omni6D<sub>out</sub> stands distinct, comprising an added set of 17 categories. Each split’s images are exclusively derived from its corresponding instances, yet all splits share rendering parameters and backgrounds uniformly. To enable comprehensive model training, we have augmented the training set with an extensive volume of rendered images, reaching a total of 0.8M.

**Coordinate system.** We formulate a unified 3D coordinate system for all pose labels, positioning the camera center as the origin. In relation to the image captured, we set +x to face outward, +y to point upwards, and +z towards the left. The pose of an object is recorded relative to what we term a canonical pose object. As illustrated in Fig. S2, an instance adjusted to the canonical pose has its bottom-face normal aligned with -y and its front-face aimed at +x (akin to being upright and facing forward). The camera’s intrinsic parameters are established as [577.5, 577.5, 319.5, 239.5], with the image size defined as 640 x 480 pixels. All data attributes, including details concerning the object’s position and dimensions, are denoted in metric units.

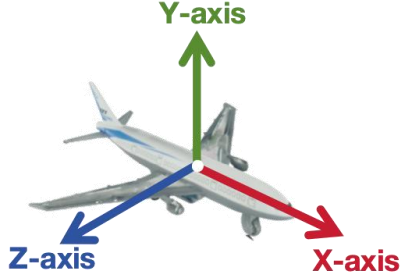

**Fig. S2: An example instance adjusted to the canonical pose.** The canonical plane has its bottom-face normal aligned with  $-y$  and its front-face aimed at  $+x$  (akin to being upright and facing forward).

**Diversity of scenes.** Each room is allocated a cube-shaped region, where objects are randomly positioned and fall free within room boundaries. Additionally, a lighting intensity range with a width of 2000 is established for each room model.

## B.2 Omni6D Statistics

We first provide a category inventory and corresponding instance counts for each category within Omni6D in Fig. S9a. Most categories have  $[10, 50]$  objects.

In Section 4.1 of the main text, we mention *clsn*. Detailed categories from *cls3* to *cls48* are listed in Fig. S3. While subdividing the categories, we first select three categories that coincide with NOCS dataset [11], particularly those included in *cls3*: *bottle*, *bowl*, and *cup*. Then, for *cls6*, we opt for three categories similar in shape to those in *cls3*, namely *medicine\_bottle*, *shampoo*, and *red\_wine\_glass*. This selection aids in effectively finetuning the model across different categories. Following that, we generally select the remaining 42 categories based on the number of instances in each category, choosing from those with more instances to those with fewer.

## B.3 Omni6D<sub>out</sub> Statistics

In Section 4.3 of the main text, we undertake 6D object pose estimation studies on Omni6D<sub>out</sub>. This process begins by loading the pre-trained Word2Vec model *GoogleNews-vectors-negative300.bin*. From the 166 categories available in Omni6D, we select the category that exhibits the highest cosine similarity with the unseen category for matching. As illustrated in Fig. S4, the text to the right of the bar graph clarifies which categories are ultimately matched with the unseen category displayed on the left. For each unseen category, our model presumes its category as the one that is matched and proceeds with pose estimation accordingly. This visual representation provides an intuitive understanding





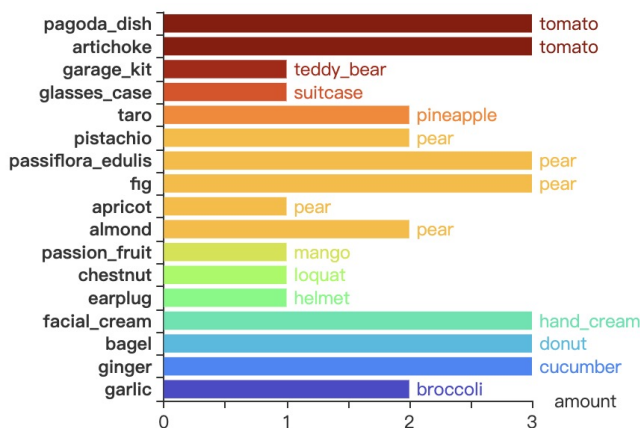

**Fig.S4: Matching unseen categories from Omni6D<sub>out</sub> to Omni6D.** The unseen categories from Omni6D<sub>out</sub> are listed on the left side of the bar graph, while the matched known categories from Omni6D are displayed on the right, clearly illustrating the optimal correspondence between unseen and known categories based on cosine similarity. The horizontal axis displays the instance count for each corresponding category. Bars of the same color underscore the same match.

**Rendering.** We employ stratified sampling to split instances within each category, subsequently dividing them into training, validation, and test sets in a 8:1:1 ratio. In constructing our dataset, we utilize 8 room models from the Replica dataset as backdrops, splitting them into training, validation, and test sets in a 2:1:1 ratio. For each scenery setup, we randomly select a room model to act as the background, along with 4-6 object instance models. Each room is allocated a cube-shaped region where objects are randomly positioned and allowed to fall freely within room boundaries, resulting in random scattering in a specific section of the room. Additionally, a lighting intensity range with a width of 2000 is established for each room model. Each object model is scaled by the pre-stored scale factor divided by 50. Considering the attention center of the combined instance models as the origin point, the camera randomly selects ten positions within an elevation angle range between  $30 - 90^\circ$ . The camera then performs rendering at these selected positions while facing towards the attention center.

**Setting.** We utilize BlenderProc 2.5.0 [4] to implement the aforementioned rendering process. The intrinsic parameters of the camera are set to [577.5, 577.5, 319.5, 239.5], with an image size specified as  $640 \times 480$ . Our approach ensures the diversity and breadth of the dataset, making it suitable for rigorous testing and yielding accurate results.

## D Omni6D-Real

To further validate the sim2real capability of models trained with Omni6D and reduce the gap between our dataset and real-world data, we constructed

**Table R2: Comparisons between Omni6D, Omni6D-xl, Omni6D-Real and existing datasets.** Our datasets significantly extend the range of everyday object categories and instances.

| Datasets              | Mode | Realism      | # Categories | # Instances   | # Images |
|-----------------------|------|--------------|--------------|---------------|----------|
| ShapeNet-SRN Cars [9] | RGB  | Synthetic    | 1            | 3514          | -        |
| Sim2Real Cars [9]     | RGB  | Real         | 1            | 10            | -        |
| CAMERA [11]           | RGBD | Synthetic    | 6            | 1085          | 0.3M     |
| REAL [11]             | RGBD | Real         | 6            | 42            | 8k       |
| Wild6D [13]           | RGBD | Real         | 5            | 1722          | 1M       |
| <b>Omni6D-Real</b>    | RGBD | Real         | 39           | 73            | 1k       |
| <b>Omni6D</b>         | RGBD | Real-Scanned | 166          | 4,688         | 0.8M     |
| <b>Omni6D-xl</b>      | RGBD | Real-Scanned | <b>339</b>   | <b>13,161</b> | 1.1M     |

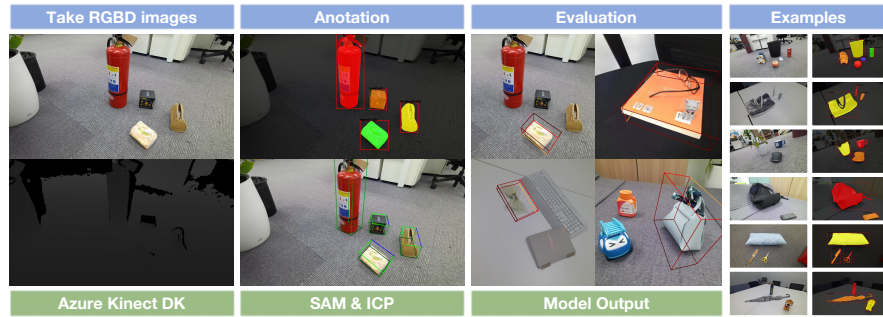

**Fig. S5: Constructing Omni6D-Real: pipeline & examples.**

a real-world dataset, *Omni6D-Real*. As shown in Tab. R2, it comprises 30 scenes, 39 categories, 73 instances, and 1k images.

**Dataset Construction.** As shown in Fig. S5, we captured RGBD images with the Azure Kinect DK<sup>3</sup> and preprocessed them using SAM [6] for object masks and ICP [2] for point cloud registration. The intrinsic parameters of the camera are set to [605.81, 605.63, 641.72, 363.23], with an image size specified as  $1280 \times 720$ . For each scene, we manually annotated 3D bounding boxes for the first frame and derived bboxes for the next frame based on registered poses. Addressing the inherent limitations of ICP, particularly its accumulating errors, we further refined the derived bboxes through manual adjustments. This iterative process, where ICP serves as an aid to manual annotation, ensures the accuracy of 3D bboxes across all frames.

**Evaluation.** We evaluated the performance of DualPoseNet [7] on our processed real-world dataset. Despite being trained solely on simulated data, the model exhibited excellent performance on real-world tasks. This demonstrates to a certain extent that our real-scanned 3D models can minimize the gap between synthetic and real images.

<sup>3</sup> <https://learn.microsoft.com/azure/kinect-dk/>

**Table R3: Detailed parameters.** Experimental settings on different baselines.

| Model           | Learning_rate | Batch_size | # GPUs |
|-----------------|---------------|------------|--------|
| SPD [10]        | 1e-4          | 128        | 4      |
| SGPA [3]        | 1e-4          | 128        | 4      |
| DualPoseNet [7] | 1e-4          | 128        | 1      |
| RBP-Pose [14]   | 1e-4          | 256        | 4      |
| GPV-Pose [5]    | 1e-4          | 256        | 4      |
| HS-Pose [15]    | 1e-4          | 256        | 4      |

**Table R4: Performance of top-20 categories on Omni6D.** Models are trained on Omni6D<sub>train</sub> and tested on Omni6D<sub>test</sub>. The table demonstrates the average performance of each algorithm across the top 20 categories, as measured by the 5°2cm metric. **Bold** and underlined results indicate the best and second-best performers.

| Methods         | Network  | $IoU_{50}$   | $IoU_{75}$   | 5°2cm        | 5°5cm        | 10°2cm       | 10°5cm       | 5°           | 10°          | 2cm          | 5cm          |
|-----------------|----------|--------------|--------------|--------------|--------------|--------------|--------------|--------------|--------------|--------------|--------------|
| SPD [10]        | implicit | 68.65        | <u>45.27</u> | <b>24.19</b> | <b>26.78</b> | <u>37.18</u> | <b>42.15</b> | <b>27.60</b> | <b>43.34</b> | 60.49        | 84.03        |
| SGPA [3]        | implicit | 70.40        | <b>48.23</b> | <u>20.17</u> | <u>21.79</u> | <b>37.30</b> | <u>40.78</u> | <u>22.26</u> | <u>41.87</u> | 63.39        | 86.14        |
| DualPoseNet [7] | hybrid   | <b>74.09</b> | 41.50        | 15.56        | 17.11        | 30.25        | 32.78        | 17.14        | 32.84        | <u>83.48</u> | <b>98.46</b> |
| RBP-Pose [14]   | hybrid   | 42.03        | 10.74        | 2.84         | 4.54         | 3.41         | 5.21         | 4.68         | 5.37         | 44.77        | 88.43        |
| GPV-Pose [5]    | explicit | 19.53        | 0.78         | 0.74         | 3.17         | 0.81         | 3.58         | 7.06         | 7.85         | 7.03         | 39.86        |
| HS-Pose [15]    | explicit | <u>72.36</u> | 37.81        | 11.94        | 13.26        | 22.08        | 23.93        | 13.37        | 24.07        | <b>86.11</b> | <u>98.31</u> |

## E Additional Experimental Details

### E.1 Experimental Settings

All experiments are conducted on a server equipped with 96 Intel(R) Xeon(R) Gold 6248R CPUs @ 3.00GHz and 8 NVIDIA A100-SXM4-80GB GPUs. We ensure consistency in all parameters and strategies throughout training, thereby maintaining uniformity in our experimental environment. For our baseline model, we adhere to the same parameters as provided by the original authors, with modifications only made to *learning\_rate*, *batch\_size*, and the corresponding number of GPUs used. Detailed parameters are displayed in Tab. R3.

We encountered some challenges during model training. Due to the larger batch size we selected compared to the original model, the training speed of the GPV-Pose model became excessively slow. The main reason for this issue is that GPV-Pose [5] model uses “for loop” for batch processing during training, which is inefficient when dealing with large-scale data. We optimized the model by replacing “for loop” with batch computations carried out at the Tensor level. This modification significantly accelerated our training speed, effectively ensuring the efficient functioning of the model.

### E.2 Performance on Omni6D

In this section, we provide the results of the 5° and 2 cm metrics for categories in Omni6D. Fig. S6 showcases the 5°(R5) and 2 cm(T2) metrics for various

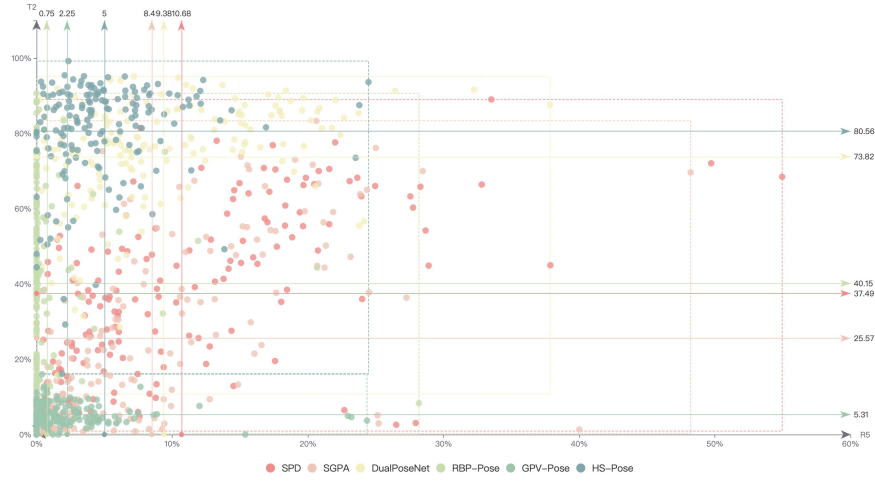

**Fig. S6: Metrics  $5^\circ$  and  $2\text{ cm}$  results on Omni6D categories.** It showcases the  $5^\circ$  (R5) and  $2\text{ cm}$  (T2) metrics for various models across different categories on the Omni6D test set. Each color represents a model, with each point indicating a category result. Dashed lines outline the range of each model’s  $5^\circ$  (R5) and  $2\text{ cm}$  (T2) metrics, while arrows depict their means.

models across different categories on the Omni6D test set. The results show that SPD and SGPA excel particularly in predicting rotations, potentially due to their implicit networks’ tendency to generate more accurate rotational predictions. On the other hand, DualPoseNet, HS-Pose and RBP-Pose offer superior estimates for translations, likely related to the capabilities of explicit network models to deliver better translation and size estimations. These findings further affirm the speculations made in Section 4.3.

Tab. R4 demonstrates the average performance of each algorithm across the top 20 categories, as measured by the  $5^\circ 2\text{ cm}$  metric. As shown in the table, it’s evident that all algorithms show improved performance across various metrics compared to the full set of 166 categories, which is foreseeable. While all algorithms see similar improvements, SPD and SGPA stand out with notable progress. Considering their bad performance on unseen categories, as outlined in the main text, it’s clear that they exhibit considerable variability in predictive accuracy across different categories. This suggests that SPD and SGPA employ a nuanced approach, finetuning their strategies for each category by leveraging their implicit network methodologies. These methodologies sync well with specific features and challenges of certain categories, enabling more accurate predictions. Conversely, their effectiveness lessens when applied to categories that mismatch their methodologies.

We also report the non-symmetry-aware metric results in Tab. R5, showing a notable performance drop compared to the symmetry-aware metric presented

**Table R5: Non-symmetry-aware metric results on Omni6D.** Models are trained on Omni6D<sub>train</sub> and tested on Omni6D<sub>test</sub>, while not using our symmetry-aware metric.

| Methods         | $IoU_{50}$   | $IoU_{75}$   | $5^\circ 2cm$ | $5^\circ 5cm$ | $10^\circ 2cm$ | $10^\circ 5cm$ | $5^\circ$   | $10^\circ$  | $2cm$        | $5cm$        |
|-----------------|--------------|--------------|---------------|---------------|----------------|----------------|-------------|-------------|--------------|--------------|
| SPD [10]        | 30.82        | <b>13.09</b> | <b>3.36</b>   | <b>3.62</b>   | <b>8.10</b>    | <b>9.06</b>    | <b>3.65</b> | <b>9.19</b> | 38.32        | 71.43        |
| SGPA [3]        | 26.43        | 10.06        | <u>2.34</u>   | <u>2.57</u>   | 6.25           | <u>7.40</u>    | <u>2.59</u> | <u>7.62</u> | 26.11        | 60.67        |
| DualPoseNet [7] | <u>35.78</u> | <u>12.32</u> | 2.06          | 2.11          | <u>6.47</u>    | 6.74           | 2.11        | 6.75        | <u>74.13</u> | <u>96.42</u> |
| RBP-Pose [14]   | 14.77        | 0.63         | 0.00          | 0.00          | 0.00           | 0.01           | 0.00        | 0.01        | 34.33        | 73.54        |
| GPV-Pose [5]    | 5.50         | 0.02         | 0.00          | 0.01          | 0.01           | 0.04           | 0.02        | 0.07        | 5.37         | 33.31        |
| HS-Pose [15]    | <b>39.18</b> | 9.68         | 0.36          | 0.37          | 2.30           | 2.43           | 0.37        | 2.44        | <b>80.65</b> | <b>97.64</b> |

**Table R6: Individual category performance on unseen categories.** Models are trained on Omni6D<sub>train</sub> and tested on Omni6D<sub>out</sub>, using the optimal DualPoseNet [7] model. The table distinctly presents results for each category, with the 1st column representing the category name and the 2nd column indicating the corresponding known matched category. The table is sorted in descending order based on the metric  $5^\circ 2cm$ .

| Category          | Match      | $IoU_{50}$ | $IoU_{75}$ | $5^\circ 2cm$ | $5^\circ 5cm$ | $10^\circ 2cm$ | $10^\circ 5cm$ | $5^\circ$ | $10^\circ$ | $2cm$ | $5cm$  |
|-------------------|------------|------------|------------|---------------|---------------|----------------|----------------|-----------|------------|-------|--------|
| passion_fruit     | mango      | 58.79      | 25.08      | 8.44          | 8.77          | 18.51          | 18.99          | 8.77      | 19.48      | 85.23 | 99.19  |
| facial_cream      | hand_cream | 53.43      | 28.61      | 7.58          | 7.82          | 16.38          | 17.60          | 7.82      | 17.60      | 84.11 | 96.82  |
| taro              | pineapple  | 58.70      | 26.48      | 5.50          | 5.65          | 16.49          | 16.79          | 5.65      | 16.79      | 89.47 | 99.39  |
| fig               | pear       | 60.64      | 24.79      | 3.52          | 3.63          | 15.69          | 15.90          | 3.95      | 16.33      | 84.85 | 99.68  |
| garlic            | broccoli   | 32.85      | 4.78       | 3.18          | 3.18          | 6.16           | 6.58           | 3.18      | 6.79       | 81.95 | 99.79  |
| earplug           | helmet     | 35.04      | 14.14      | 2.69          | 3.08          | 9.23           | 9.87           | 3.08      | 9.87       | 88.72 | 98.72  |
| passiflora_edulis | pear       | 37.76      | 15.22      | 1.82          | 1.82          | 7.29           | 7.75           | 1.82      | 7.75       | 77.51 | 99.24  |
| bagel             | donut      | 38.71      | 13.92      | 1.75          | 2.25          | 9.64           | 10.26          | 2.25      | 10.26      | 83.35 | 99.12  |
| artichoke         | tomato     | 48.20      | 13.77      | 0.78          | 0.90          | 3.70           | 4.26           | 1.01      | 4.48       | 79.28 | 99.22  |
| pagoda_dish       | tomato     | 32.66      | 4.45       | 0.78          | 0.91          | 2.22           | 2.61           | 0.91      | 3.00       | 82.40 | 98.31  |
| ginger            | cucumber   | 30.33      | 1.54       | 0.78          | 0.78          | 2.08           | 2.86           | 0.78      | 2.86       | 59.48 | 98.70  |
| almond            | pear       | 23.43      | 1.88       | 0.76          | 0.89          | 1.78           | 2.28           | 1.02      | 2.41       | 80.58 | 99.11  |
| garage_kit        | teddy_bear | 26.66      | 5.44       | 0.59          | 0.73          | 2.42           | 2.87           | 0.83      | 3.08       | 71.59 | 97.09  |
| glasses_case      | suitcase   | 37.99      | 5.24       | 0.44          | 0.44          | 0.88           | 1.32           | 0.44      | 1.32       | 90.79 | 96.93  |
| chestnut          | loquat     | 22.73      | 1.97       | 0.27          | 0.40          | 0.93           | 1.19           | 0.40      | 1.19       | 57.43 | 97.75  |
| pistachio         | pear       | 23.56      | 2.03       | 0.17          | 0.17          | 0.34           | 0.52           | 0.17      | 0.69       | 80.72 | 99.66  |
| apricot           | pear       | 11.48      | 0.26       | 0.00          | 0.00          | 0.00           | 0.00           | 0.00      | 0.00       | 80.32 | 100.00 |

in Tab. 2. As discussed in Fig. 2, the prevalence of rotational invariance in 3D models makes the consideration of symmetry indispensable.

### E.3 Generalization Performance

Tab. R6 distinctly presents the results for each category, derived from tests using the optimal DualPoseNet [7] model. In this table, the first column lists the category name while the second column indicates the corresponding known matched category. It can be observed that prediction for translation is almost category-independent, while rotation is closely related to the category.

**Table R7: Performance of SPD on Omni6D dataset trained from scratch.** It presents the performance of the SPD model when trained from scratch separately on various subsets of the Omni6D dataset, specifically cls3, cls6, cls12, cls24, and cls48, each of which contains a different number of categories.

| Train                     | Test  | $IoU_{50}$ | $IoU_{75}$ | $5^\circ 2cm$ | $5^\circ 5cm$ | $10^\circ 2cm$ | $10^\circ 5cm$ | $5^\circ$ | $10^\circ$ | $2cm$ | $5cm$ |
|---------------------------|-------|------------|------------|---------------|---------------|----------------|----------------|-----------|------------|-------|-------|
| train-from-scratch(cls3)  | cls3  | 44.27      | 20.50      | 9.52          | 10.56         | 14.45          | 17.13          | 10.85     | 17.98      | 41.98 | 65.42 |
| train-from-scratch(cls6)  | cls6  | 54.94      | 28.37      | 14.96         | 16.86         | 20.75          | 24.91          | 17.26     | 25.62      | 51.13 | 74.89 |
| train-from-scratch(cls12) | cls12 | 55.30      | 29.47      | 12.92         | 15.01         | 21.90          | 26.31          | 15.59     | 27.58      | 49.99 | 77.51 |
| train-from-scratch(cls24) | cls24 | 57.37      | 31.08      | 11.90         | 13.44         | 22.67          | 26.36          | 14.02     | 27.62      | 52.98 | 79.73 |
| train-from-scratch(cls48) | cls48 | 48.22      | 24.54      | 9.07          | 11.07         | 17.53          | 22.15          | 11.89     | 23.63      | 41.60 | 73.28 |

**Table R8: Performance of SPD on Omni6D dataset with finetuning strategy.** It presents the performance of the SPD model initially pretrained on CAMERA dataset [11] and then incrementally finetuned using various subsets of the Omni6D dataset, specifically cls3, cls6, cls12, cls24, and cls48.

| Train                   | Test  | $IoU_{50}$ | $IoU_{75}$ | $5^\circ 2cm$ | $5^\circ 5cm$ | $10^\circ 2cm$ | $10^\circ 5cm$ | $5^\circ$ | $10^\circ$ | $2cm$ | $5cm$ |
|-------------------------|-------|------------|------------|---------------|---------------|----------------|----------------|-----------|------------|-------|-------|
| pretrain (CAMERA)       | cls3  | 16.63      | 0.79       | 0.05          | 0.59          | 0.09           | 0.93           | 2.55      | 3.60       | 2.29  | 23.53 |
| finetune (CAMERA+cls3)  | cls3  | 46.19      | 21.42      | 10.20         | 11.49         | 16.71          | 19.59          | 11.79     | 20.18      | 53.39 | 79.83 |
| finetune (CAMERA+cls6)  | cls6  | 60.85      | 32.57      | 15.09         | 17.84         | 23.63          | 28.54          | 18.02     | 28.82      | 62.89 | 86.03 |
| finetune (CAMERA+cls12) | cls12 | 56.67      | 29.71      | 13.18         | 15.08         | 22.54          | 26.34          | 15.50     | 26.92      | 58.31 | 83.68 |
| finetune (CAMERA+cls24) | cls24 | 55.82      | 28.81      | 12.06         | 13.58         | 22.24          | 26.02          | 14.03     | 26.95      | 57.92 | 84.36 |
| finetune (CAMERA+cls48) | cls48 | 45.06      | 22.76      | 9.22          | 11.22         | 17.10          | 21.36          | 11.96     | 22.67      | 44.80 | 74.66 |

#### E.4 Category-wise Analysis

In the corresponding subsection under Section 4.3, we introduce the concept of diversity. Assume that  $C_i$  is the set of all instances within category  $i$ ,  $c_{ij}$  and  $c_{ik}$  are two instances within this set, and  $\text{Chamfer}(c_{ij}, c_{ik})$  is the Chamfer distance [1] between instances  $c_{ij}$  and  $c_{ik}$ . Then, the diversity  $D_i$  within category  $i$  can be calculated as:

$$D_i = \frac{1}{|C_i|^2} \sum_{j=1}^{|C_i|} \sum_{k=1}^{|C_i|} \text{Chamfer}(c_{ij}, c_{ik}). \quad (1)$$

Essentially, this formula calculates the average Chamfer distance among all possible pairs of instances within a category, serving as a measure of diversity for that category. A larger result indicates higher intra-class diversity among instances within that category. Fig. S9b depicts the intra-class diversity across various categories in Omni6D.

#### E.5 Finetune from Limited Categories

As elaborated in the corresponding subsection under Section 4.3 in the main text, Tabs. R7 to R12 respectively present the specific numerical results of the

**Table R9: Performance of DualPoseNet on Omni6D trained from scratch.** It presents the performance of the DualPoseNet model when trained from scratch separately on various subsets of Omni6D.

| Train                     | Test  | $IoU_{50}$ | $IoU_{75}$ | $5^\circ 2cm$ | $5^\circ 5cm$ | $10^\circ 2cm$ | $10^\circ 5cm$ | $5^\circ$ | $10^\circ$ | $2cm$ | $5cm$ |
|---------------------------|-------|------------|------------|---------------|---------------|----------------|----------------|-----------|------------|-------|-------|
| train-from-scratch(cls3)  | cls3  | 66.53      | 39.60      | 17.03         | 17.24         | 29.20          | 29.68          | 17.24     | 29.68      | 90.29 | 96.60 |
| train-from-scratch(cls6)  | cls6  | 76.27      | 44.62      | 20.59         | 21.12         | 32.59          | 33.84          | 21.16     | 33.90      | 87.75 | 96.81 |
| train-from-scratch(cls12) | cls12 | 68.21      | 37.83      | 17.06         | 18.02         | 27.86          | 29.70          | 18.08     | 29.79      | 81.73 | 96.52 |
| train-from-scratch(cls24) | cls24 | 70.14      | 43.01      | 19.99         | 20.92         | 33.03          | 34.83          | 21.03     | 34.94      | 82.58 | 96.90 |
| train-from-scratch(cls48) | cls48 | 65.00      | 33.47      | 10.18         | 11.07         | 23.43          | 25.50          | 11.12     | 25.63      | 76.38 | 96.48 |

**Table R10: Performance of DualPoseNet on Omni6D with finetuning strategy.** It presents the performance of the DualPoseNet model initially pretrained on CAMERA dataset [11] and then incrementally finetuned using various subsets of Omni6D.

| Train                   | Test  | $IoU_{50}$ | $IoU_{75}$ | $5^\circ 2cm$ | $5^\circ 5cm$ | $10^\circ 2cm$ | $10^\circ 5cm$ | $5^\circ$ | $10^\circ$ | $2cm$ | $5cm$ |
|-------------------------|-------|------------|------------|---------------|---------------|----------------|----------------|-----------|------------|-------|-------|
| pretrain (CAMERA)       | cls3  | 29.04      | 5.45       | 3.42          | 3.91          | 3.92           | 4.48           | 4.05      | 4.62       | 67.28 | 89.58 |
| finetune (CAMERA+cls3)  | cls3  | 75.25      | 44.57      | 17.72         | 17.72         | 32.95          | 33.70          | 17.72     | 33.70      | 91.52 | 96.51 |
| finetune (CAMERA+cls6)  | cls6  | 77.34      | 46.32      | 23.17         | 23.66         | 34.00          | 35.27          | 23.73     | 35.37      | 89.96 | 97.32 |
| finetune (CAMERA+cls12) | cls12 | 68.61      | 37.58      | 17.17         | 17.88         | 28.15          | 29.45          | 17.94     | 29.58      | 83.22 | 96.83 |
| finetune (CAMERA+cls24) | cls24 | 70.68      | 43.00      | 22.55         | 22.96         | 33.82          | 35.61          | 22.96     | 35.61      | 89.62 | 96.83 |
| finetune (CAMERA+cls48) | cls48 | 64.60      | 34.52      | 13.57         | 14.36         | 25.34          | 27.01          | 14.45     | 27.20      | 77.68 | 96.08 |

training from scratch and finetuning experiments conducted by SPD, DualPoseNet, and HS-Pose.

For the training from scratch experiments, it is observed that an increase in the number of categories during the training and testing phases generally leads to a decline in most performance indicators. Contrastingly, in the finetuning experiments, as the number of categories used for finetuning and testing increases, most performance indicators do show a decline. However, certain metrics like  $5\text{ cm}$  remain relatively stable, and the decrease in other metrics isn't as severe as when training from scratch. This observation points to the robustness of the pretraining and incremental finetuning approach across a different number of categories, emphasizing its effectiveness.

## E.6 Qualitative Comparisons

For category-level 6D pose and size estimation, we visualize more qualitative results of different methods on  $\text{Omni6D}_{test}$  and  $\text{Omni6D}_{out}$  in Fig. S10 and Fig. S11. These figures illustrate the models' ability to generalize within known categories (intra-class generalization) as well as across unseen categories (inter-class generalization).

**Table R11: Performance of HS-Pose on Omni6D trained from scratch.** It presents the performance of the HS-Pose model when trained from scratch separately on various subsets of Omni6D.

| Train                     | Test  | $IoU_{50}$ | $IoU_{75}$ | $5^\circ 2cm$ | $5^\circ 5cm$ | $10^\circ 2cm$ | $10^\circ 5cm$ | $5^\circ$ | $10^\circ$ | $2cm$ | $5cm$ |
|---------------------------|-------|------------|------------|---------------|---------------|----------------|----------------|-----------|------------|-------|-------|
| train-from-scratch(cls3)  | cls3  | 94.46      | 86.57      | 47.65         | 48.28         | 81.81          | 83.70          | 48.54     | 83.96      | 90.33 | 97.21 |
| train-from-scratch(cls6)  | cls6  | 93.61      | 82.65      | 48.79         | 49.93         | 74.03          | 76.24          | 49.93     | 76.33      | 90.71 | 97.68 |
| train-from-scratch(cls12) | cls12 | 81.40      | 57.79      | 21.78         | 22.13         | 42.79          | 43.93          | 22.13     | 43.94      | 87.48 | 98.45 |
| train-from-scratch(cls24) | cls24 | 79.75      | 52.25      | 16.92         | 17.58         | 37.17          | 38.93          | 17.59     | 38.95      | 87.66 | 98.38 |
| train-from-scratch(cls48) | cls48 | 73.30      | 39.62      | 8.79          | 9.16          | 23.97          | 25.41          | 9.18      | 25.49      | 83.69 | 98.42 |

**Table R12: Performance of HS-Pose on Omni6D with finetuning strategy.** It presents the performance of the HS-Pose model initially pretrained on CAMERA dataset [11] and then incrementally finetuned using various subsets of Omni6D.

| Train                   | Test  | $IoU_{50}$ | $IoU_{75}$ | $5^\circ 2cm$ | $5^\circ 5cm$ | $10^\circ 2cm$ | $10^\circ 5cm$ | $5^\circ$ | $10^\circ$ | $2cm$ | $5cm$ |
|-------------------------|-------|------------|------------|---------------|---------------|----------------|----------------|-----------|------------|-------|-------|
| pretrain (CAMERA)       | cls3  | 31.67      | 7.14       | 4.13          | 5.12          | 6.38           | 7.91           | 5.19      | 8.25       | 70.56 | 92.27 |
| finetune (CAMERA+cls3)  | cls3  | 94.04      | 88.29      | 62.52         | 63.92         | 84.51          | 87.41          | 63.92     | 87.41      | 90.87 | 97.60 |
| finetune (CAMERA+cls6)  | cls6  | 94.47      | 86.19      | 56.20         | 58.06         | 79.82          | 82.76          | 58.10     | 82.89      | 90.76 | 97.87 |
| finetune (CAMERA+cls12) | cls12 | 83.85      | 61.37      | 28.37         | 29.03         | 48.73          | 50.37          | 29.03     | 50.43      | 87.48 | 97.98 |
| finetune (CAMERA+cls24) | cls24 | 81.35      | 56.59      | 23.27         | 24.04         | 43.22          | 45.16          | 24.05     | 45.22      | 87.68 | 98.43 |
| finetune (CAMERA+cls48) | cls48 | 75.18      | 45.11      | 14.42         | 15.02         | 30.45          | 32.24          | 15.02     | 32.31      | 83.34 | 98.45 |

## F Visual Realism

### F.1 Questionnaire settings

We evaluated the visual realism of Omni6D in comparison to other datasets through a survey involving 70 human subjects. We randomly selected 10 images from Omni6D, CAMERA [11], REAL [11], and Wild6D datasets [13]. To introduce noise, we blended in 2 images from COCO [8], which includes captured photos, and 3 images from SKETCH<sup>4</sup>, which comprises rendered images. We randomly shuffled the order of the aforementioned 45 images and asked subjects to rate them anonymously, *i.e.*, participants were unaware of the dataset to which each image belonged. Subjects were asked to rate the realism of sampled images on a scale from 1 (least realistic) to 5 (most realistic). Here is the specific instruction for this survey: *In this subsection, participants are required to rate the fidelity of the images, i.e., how closely they resemble images seen by the human eye. Ratings range from 1 to 5, with 1 representing a complete absence of fidelity and 5 denoting full congruence with perceptual images.*

### F.2 Questionnaire results

We reported the average ratings and standard deviations for all datasets in Fig. S7, along with a sampled image from the questionnaire. Fig. S8 illustrates

<sup>4</sup> <https://sketchfab.com/>



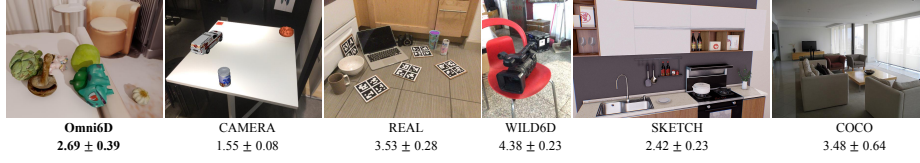

**Fig. S7: Comparison of Visual Realism.** Complete results, including ratings for all datasets in the survey.

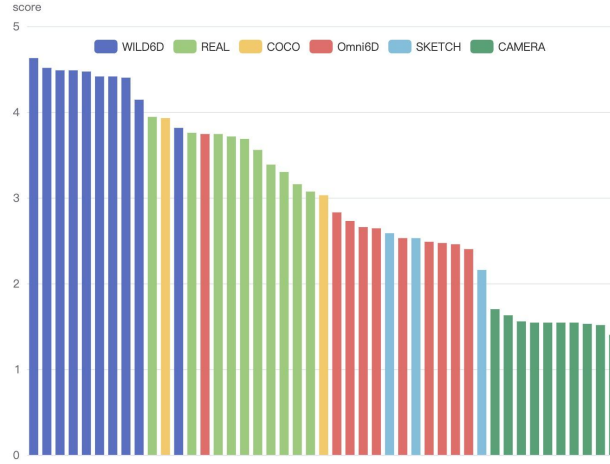

**Fig. S8: Fidelity ratings for each image.** It displays the average ratings of all images in the questionnaire across 70 surveys, while the bar chart shows a gradual decrease in ratings from left to right, with each color representing a different dataset.

the average rating for each image. It can be observed that despite Omni6D having lower fidelity compared to captured photos, its ratings are significantly higher than those of CAMERA, which are also synthetic images. Furthermore, there is a noticeable gap between the ratings of Omni6D and CAMERA, with some images from Omni6D closely resembling captured photos.

## References

1. Barrow, H.G., Tenenbaum, J.M., Bolles, R.C., Wolf, H.C.: Parametric correspondence and chamfer matching: Two new techniques for image matching. In: IJCAI. pp. 659–663. William Kaufmann (1977)
2. Besl, P.J., McKay, N.D.: A method for registration of 3-d shapes. *IEEE Trans. Pattern Anal. Mach. Intell.* **14**(2), 239–256 (1992)
3. Chen, K., Dou, Q.: SGPA: structure-guided prior adaptation for category-level 6d object pose estimation. In: ICCV. pp. 2753–2762 (2021)
4. Denninger, M., Winkelbauer, D., Sundermeyer, M., Boerdijk, W., Knauer, M., Strobl, K.H., Humt, M., Triebel, R.: Blenderproc2: A procedural pipeline for photorealistic rendering. *J. Open Source Softw.* **8**(83), 4901 (2023)
5. Di, Y., Zhang, R., Lou, Z., Manhardt, F., Ji, X., Navab, N., Tombari, F.: Gpv-pose: Category-level object pose estimation via geometry-guided point-wise voting. In: CVPR. pp. 6771–6781 (2022)
6. Kirillov, A., Mintun, E., Ravi, N., Mao, H., Rolland, C., Gustafson, L., Xiao, T., Whitehead, S., Berg, A.C., Lo, W.Y., Dollár, P., Girshick, R.: Segment anything. [arXiv:2304.02643](https://arxiv.org/abs/2304.02643) (2023)
7. Lin, J., Wei, Z., Li, Z., Xu, S., Jia, K., Li, Y.: Dualposenet: Category-level 6d object pose and size estimation using dual pose network with refined learning of pose consistency. In: ICCV. pp. 3540–3549 (2021)
8. Lin, T.Y., Maire, M., Belongie, S., Hays, J., Perona, P., Ramanan, D., Dollár, P., Zitnick, C.L.: Microsoft coco: Common objects in context. In: Computer Vision—ECCV 2014: 13th European Conference, Zurich, Switzerland, September 6–12, 2014, Proceedings, Part V 13. pp. 740–755 (2014)
9. Lin, Y., Florence, P., Barron, J.T., Rodriguez, A., Isola, P., Lin, T.: inerf: Inverting neural radiance fields for pose estimation. In: IROS. pp. 1323–1330 (2021)
10. Tian, M., Ang, M.H., Lee, G.H.: Shape prior deformation for categorical 6d object pose and size estimation. In: ECCV (21). pp. 530–546 (2020)
11. Wang, H., Sridhar, S., Huang, J., Valentin, J., Song, S., Guibas, L.J.: Normalized object coordinate space for category-level 6d object pose and size estimation. In: CVPR. pp. 2642–2651 (2019)
12. Wu, T., Zhang, J., Fu, X., Wang, Y., Ren, J., Pan, L., Wu, W., Yang, L., Wang, J., Qian, C., Lin, D., Liu, Z.: Omniobject3d: Large-vocabulary 3d object dataset for realistic perception, reconstruction and generation. In: CVPR. pp. 803–814 (2023)
13. Ze, Y., Wang, X.: Category-level 6d object pose estimation in the wild: A semi-supervised learning approach and A new dataset. In: NeurIPS (2022)
14. Zhang, R., Di, Y., Lou, Z., Manhardt, F., Tombari, F., Ji, X.: Rbp-pose: Residual bounding box projection for category-level pose estimation. In: ECCV (1). pp. 655–672 (2022)
15. Zheng, L., Wang, C., Sun, Y., Dasgupta, E., Chen, H., Leonardis, A., Zhang, W., Chang, H.J.: Hs-pose: Hybrid scope feature extraction for category-level object pose estimation. In: CVPR. pp. 17163–17173 (2023)

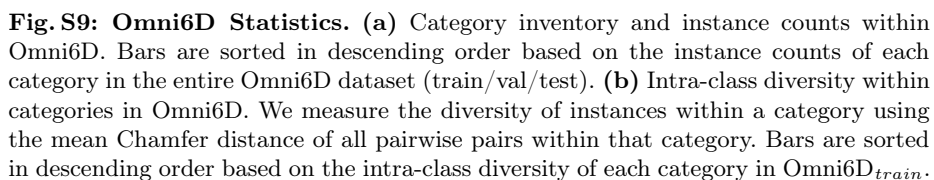

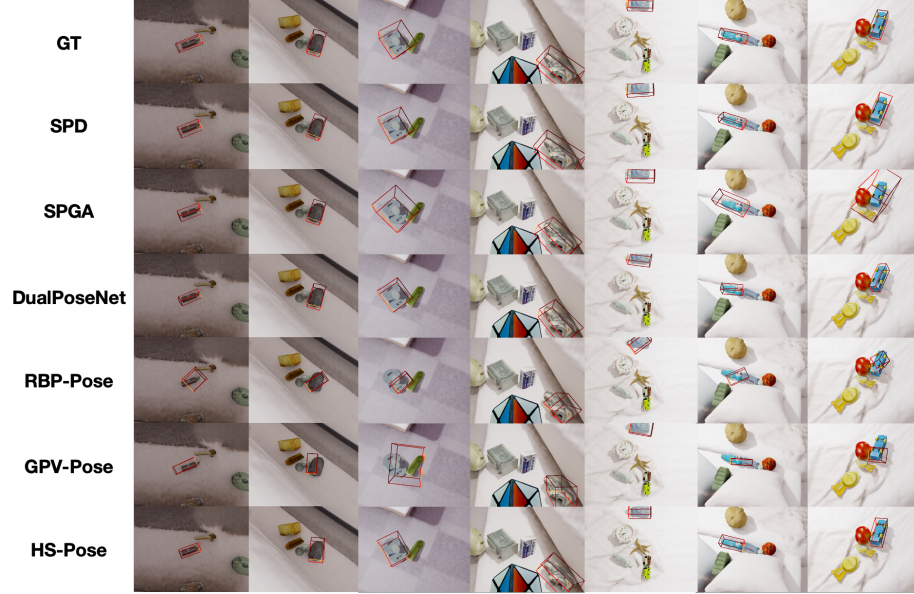

**Fig.S10: Qualitative 6D pose and size estimation on Omni6D.** From top to bottom, figures correspond to results of ground truth, SPD [10], SPGA [3], DualPoseNet [7], RBP-Pose [14], GPV-Pose [5], HS-Pose [15] on  $\text{Omni6D}_{test}$ .

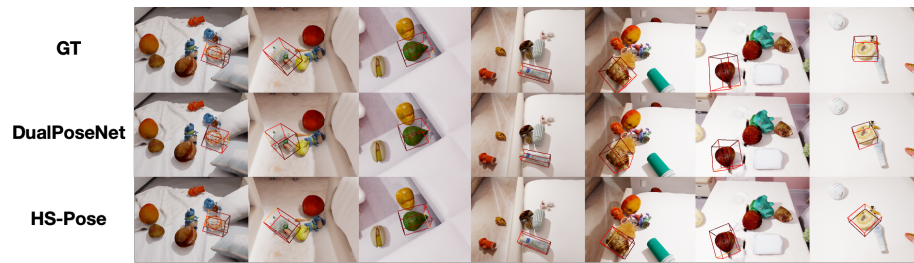

**Fig. S11: Qualitative 6D pose and size estimation on unseen categories.** From top to bottom, figures correspond to results of ground truth, DualPoseNet [7] and HS-Pose [15] on  $\text{Omni6D}_{out}$ . We only showcase results from two models, DualPoseNet and HS-Pose, both of which exhibit inter-class generalization abilities.
